# Supplementary material for: Profile of Pancreatic and Ileal Microbiota in Experimental Acute Pancreatitis
Source: MDPI journal article supplement (doi:10.3390/microorganisms11112707), 2023-11-04
Supplement: s1 [file s1]

## Supplementary Figures

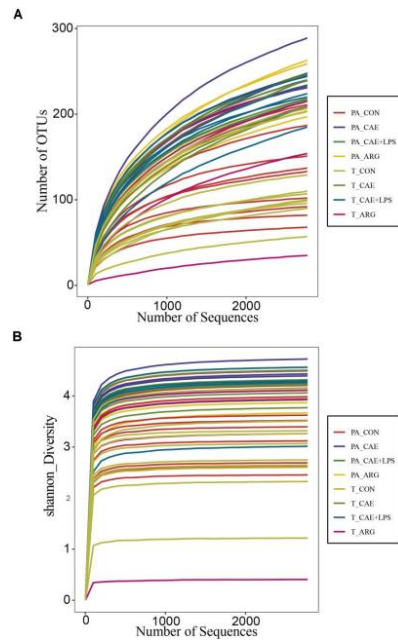

**Supplementary Figure S1. Rarefaction analysis and Shannon diversity of all samples. (A) The curve of rarefaction analysis. (B) Shannon diversity curve of single sample in each group.**

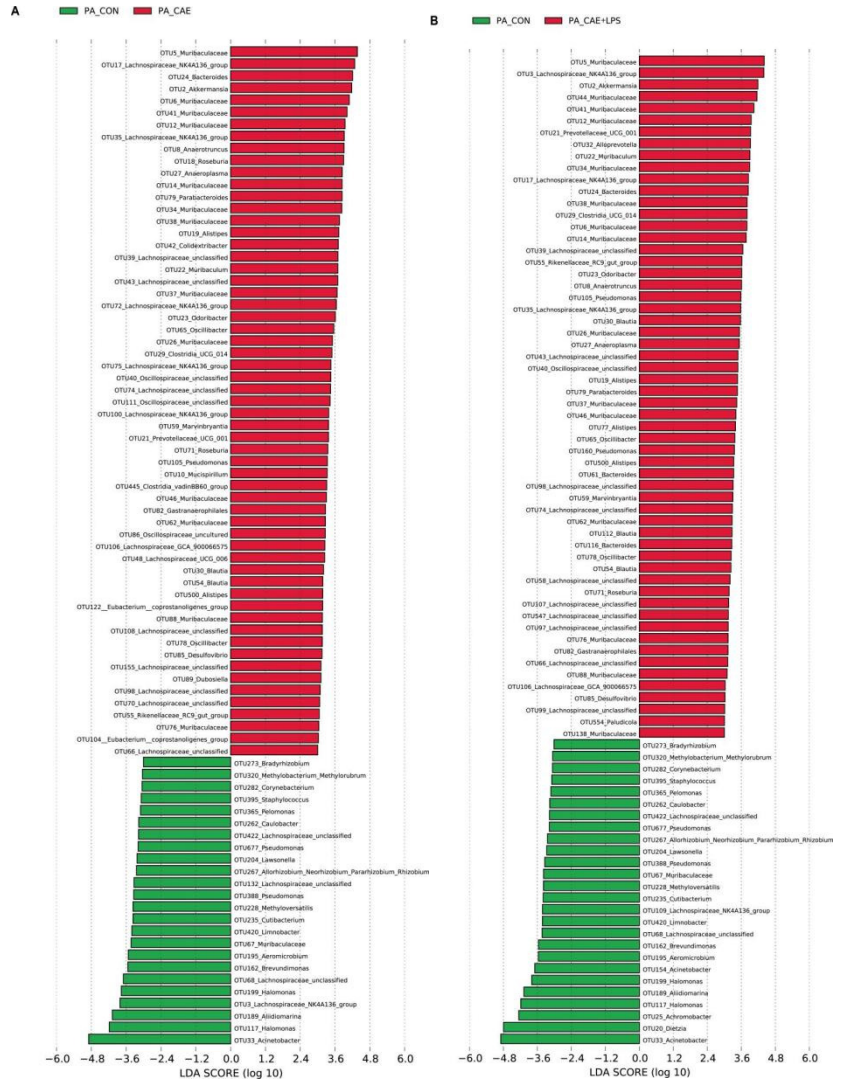

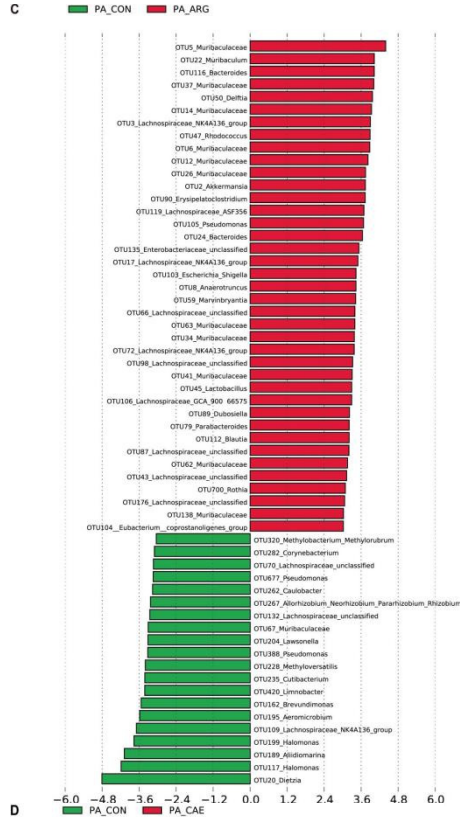

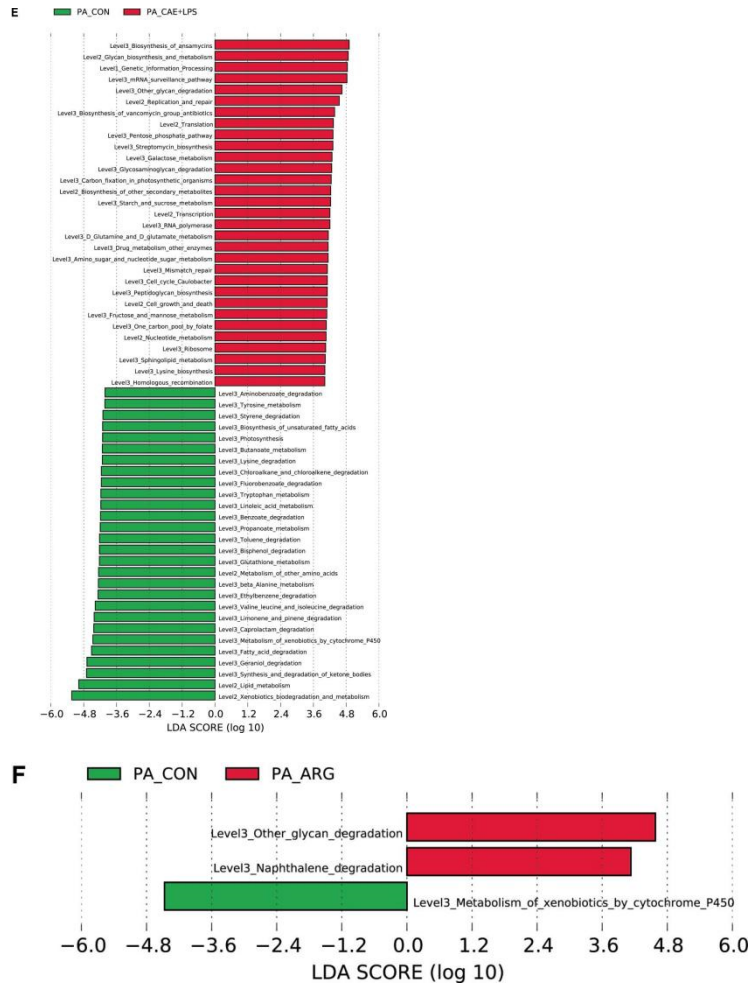

**Supplementary Figure S2. Differences in microbiota and functional changes of three AP groups in the pancreas. (A-C) Differences in the microbiota of three AP groups in the pancreas compared to the CON group (LDA>3, P<0.05). (D-F) Functional changes of three AP groups in the pancreas compared to the CON group (LDA>4, P<0.05).**

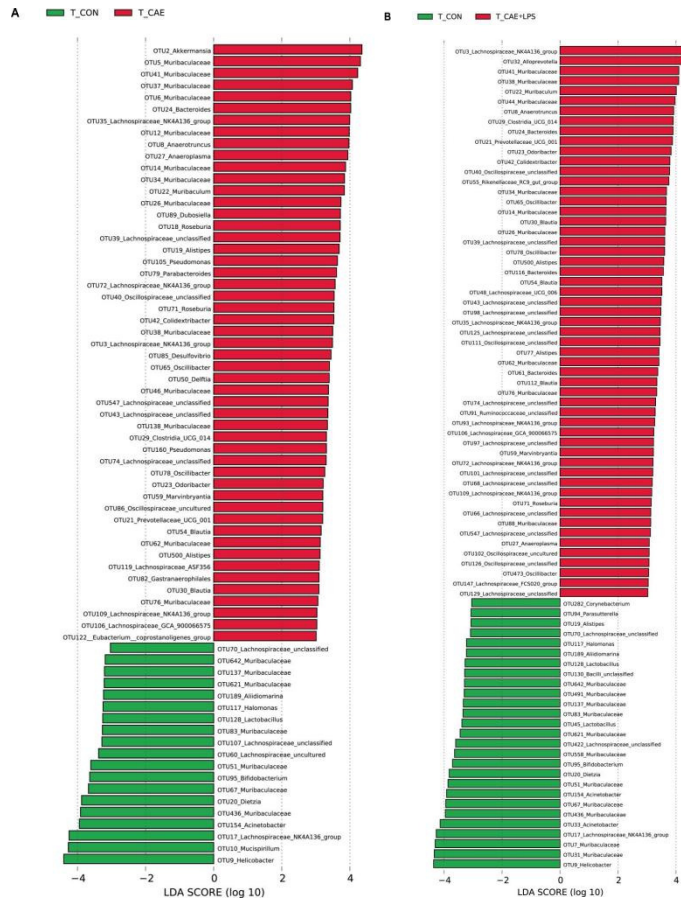

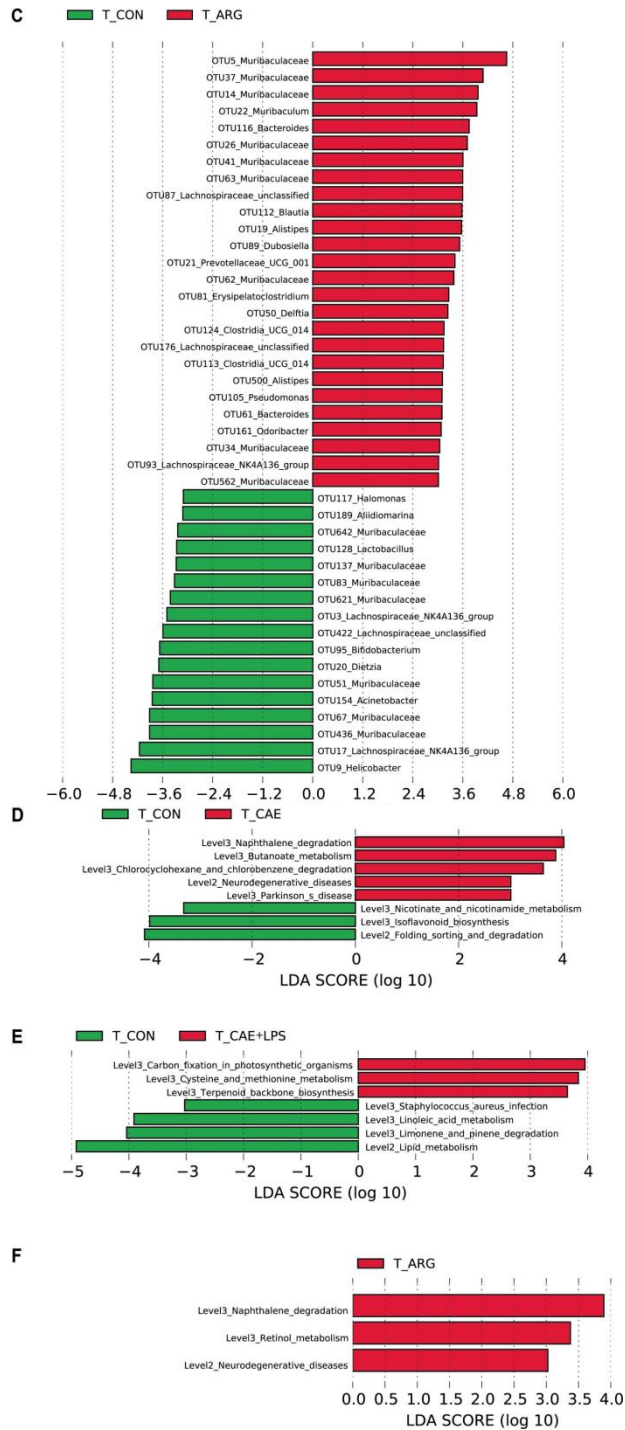

**Supplementary Figure S3. Differences in microbiota and functional changes of three AP groups in the ileum. (A-C) Differences in the microbiota of three AP groups in the ileum compared to the CON group (LDA>3, P<0.05). (D-F) Functional changes of three AP groups in the ileum compared to the CON group (LDA>4, P<0.05).**
